# Supplementary material for: Phenazine-integrated conjugated microporous polymers for modulating the mechanics of supercapacitor electrodes
Source: Royal Society of Chemistry journal article supplement (doi:10.1039/d3ma00979c), 2023-12-21
Supplement: d3ma00979c1.pdf [file d3ma00979c1.pdf]

## Supporting Information

for

### **Phenazines-Integrated Conjugated Microporous Polymers for Modulating the Mechanics of Supercapacitor Electrodes**

Mohammed G. Kotp,<sup>a</sup> Johann Lüder,<sup>a,b</sup> Shiao-Wei Kuo,<sup>a</sup> and Ahmed F. M. EL-Mahdy\*<sup>a,c</sup>

- a. Department of Materials and Optoelectronic Science, National Sun Yat-Sen University, Kaohsiung, 80424, Taiwan
- b. Center for Theoretical and Computational Physics, National Sun Yat-Sen University, Kaohsiung 80424, Taiwan
- c. Chemistry Department, Faculty of Science, Assiut University, Assiut 71516, Egypt.

Corresponding Author:

E-mail: [ahmedelmahdy@mail.nsysu.edu.tw](mailto:ahmedelmahdy@mail.nsysu.edu.tw) (A. F. M. EL-Mahdy)

## S.1 Materials

| NO. | MATERIAL                                                                              | SUPPLIER           |
|-----|---------------------------------------------------------------------------------------|--------------------|
| 1   | 1,1'Bis(diphenylphosphino)ferrocene]dichloropalladium(II)Pd(dppf)<br>)Cl <sub>2</sub> | San Diego, USA     |
| 2   | Palladium-tetrakis(triphenylphosphine) (Pd(PPh <sub>3</sub> ) <sub>4</sub> )          | Sigma Aldrich, USA |
| 3   | potassium carbonate (K <sub>2</sub> CO <sub>3</sub> )                                 | Sigma Aldrich, USA |
| 4   | N-Bromo-succinimide (NBS)                                                             | TCI, USA           |
| 5   | Ammonium hydroxide (NH <sub>4</sub> OH)                                               | TCI, USA           |
| 6   | Tin (II) chloride (SnCl <sub>2</sub> )                                                | TCI, USA           |
| 7   | Potassium hydroxide (KOH)                                                             | TCI, USA           |
| 8   | Dioxane                                                                               | TCI, USA           |
| 9   | DMF                                                                                   | TCI, USA           |
| 10  | EtOH                                                                                  | TCI, USA           |
| 11  | Acetic acid                                                                           | TCI, USA           |
| 12  | Triethylamine                                                                         | Sigma Aldrich, USA |

## S.2 Characterizations

FTIR tests were achieved through synthesis of classical KBr disks then scanned by a Bruker Tensor 27 FTIR spectrophotometer in the wavenumber range between 550:4000 cm<sup>-1</sup> and 4 cm<sup>-1</sup> resolution rate. Both <sup>1</sup>H and <sup>13</sup>C NMR scans examined after solvation our monomers in CDCl<sub>3</sub> by an INOVA 500 instrument and applying Tetramethylsilane (TMS) as an out reference, moreover, chemical shifts were recorded by part per million (ppm). Thermo gravimetric analysis (TGA) of our polymers were achieved under nitrogen environment through well closing of them in Pt cell then raising the temperature to 800 °C by regular raising rate 20 °C min<sup>-1</sup>. Solid state nuclear magnetic resonance (SSNMR) profiles were achieved via Bruker Avance 400 NMR instrument which has Bruker magic-angle-spinning (MAS) sensor (32,000 scans). Surface areas and porosities measurements of our synthesized polymers were achieved through Micromeritics ASAP 2020 surface area and porosity analyser, measurements occurred

after complete degassing of our samples. Gaining nitrogen isotherms was supported more by the progressive exposure to high purity N<sub>2</sub> in liquefied nitrogen. A JEOL JSM-7610F scanning electron microscope was used for surface visualization (FE-SEM), furthermore, prior to visualization samples films were coated by Pt (Pt sputtering) for 150 s for superior monitoring. Transmission electron microscopy (TEM) images were formed via using the modified JEOL-2100 scanning electron microscope at 200 KV.

### S.3 Synthetic Methodologies

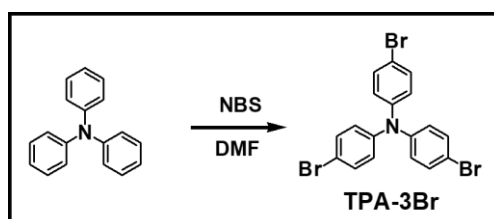

**Scheme S1** Synthesis of Tris(4-bromophenyl)amine (TPA-3Br).

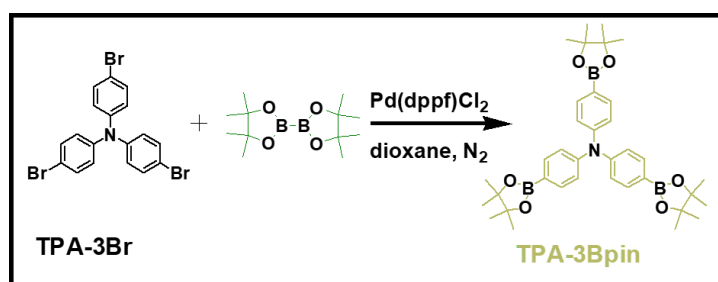

**Scheme S2** Synthesis of tris(4-(4,4,5,5-tetramethyl-1,3,2-dioxaborolan-2-yl)phenyl)amine (TPA-3Bpin).

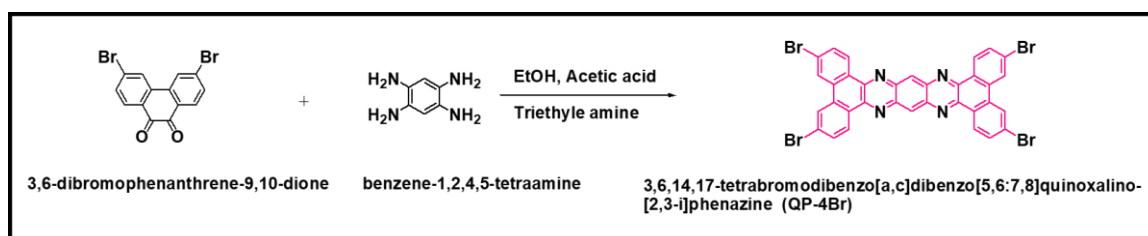

**Scheme S3** Synthesis of 3,6,14,17-tetrabromodibenzo[a,c]-dibenzo[5,6:7,8]-quinoxalino-[2,3-i]phenazine (QP-4Br).

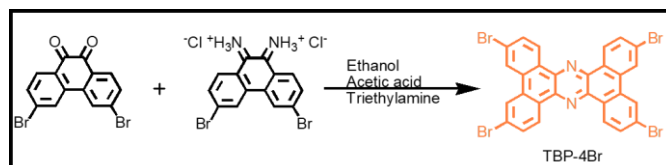

**Scheme S4** Synthesis of tetrabromotetrabenzophenazine (TBP-4Br).

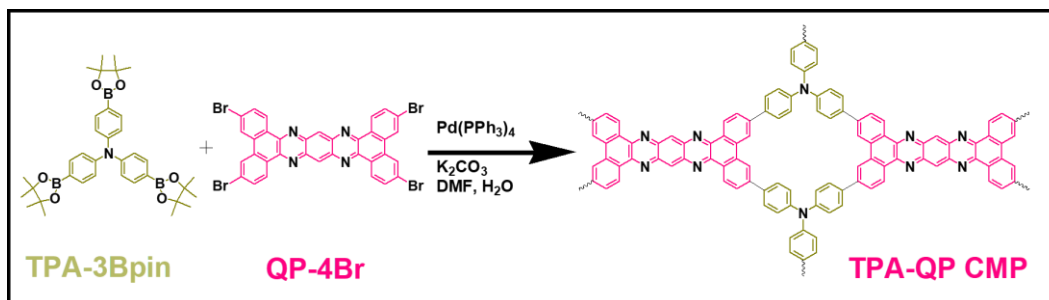

**Scheme S5** Synthesis of TPA-QP CMP.

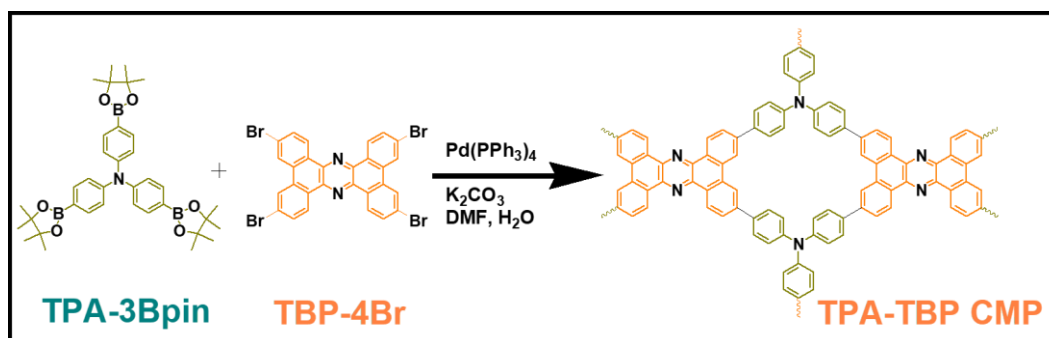

**Scheme S6** Synthesis of TPA-TBP CMP.

#### S.4 FTIR Spectral Profiles

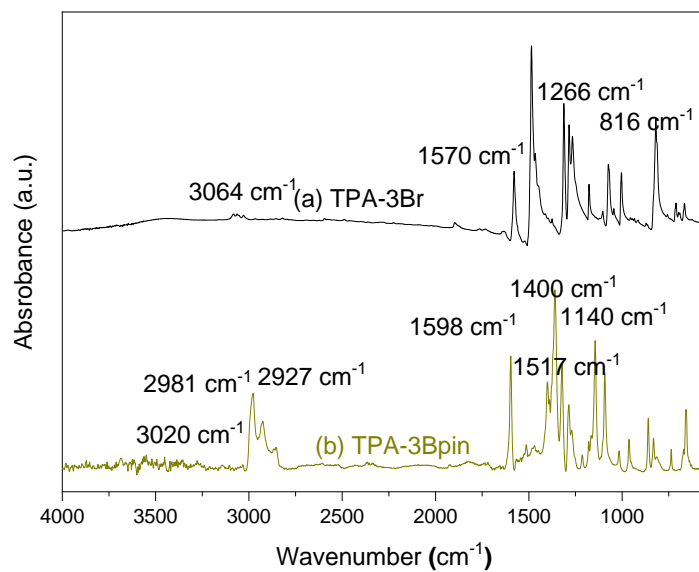

**Fig. S1** FTIR spectrum of TPA-Br, and TPA-3Bpin.

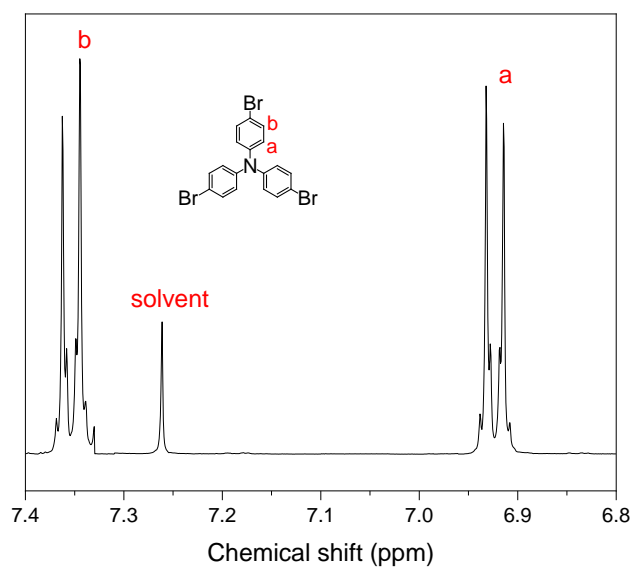

**Fig. S2**  $^1\text{H}$  NMR spectrum of TPA-3Br.

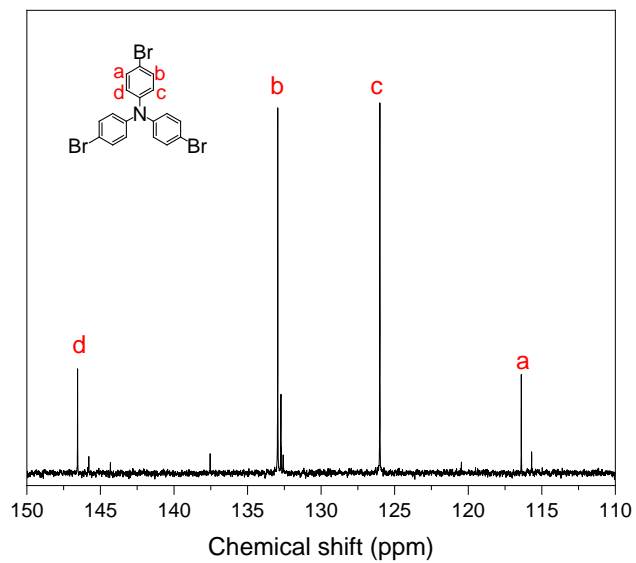

**Fig. S3**  $^{13}\text{C}$  NMR spectrum of TPA-3Br.

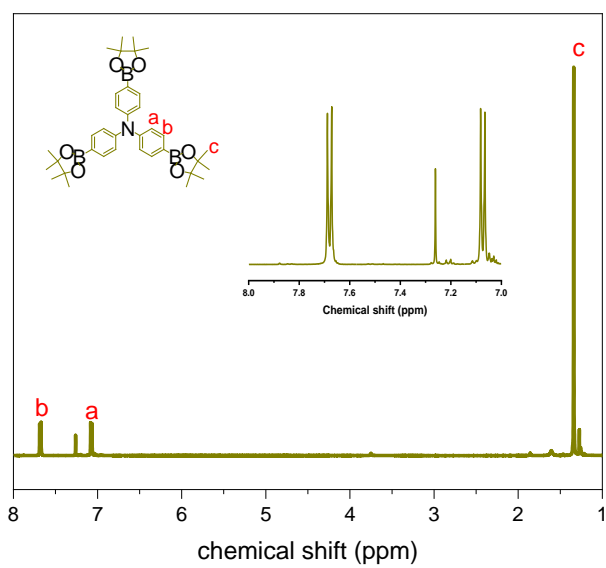

**Fig. S4**  $^1\text{H}$  NMR spectrum of TPA-Bpin.

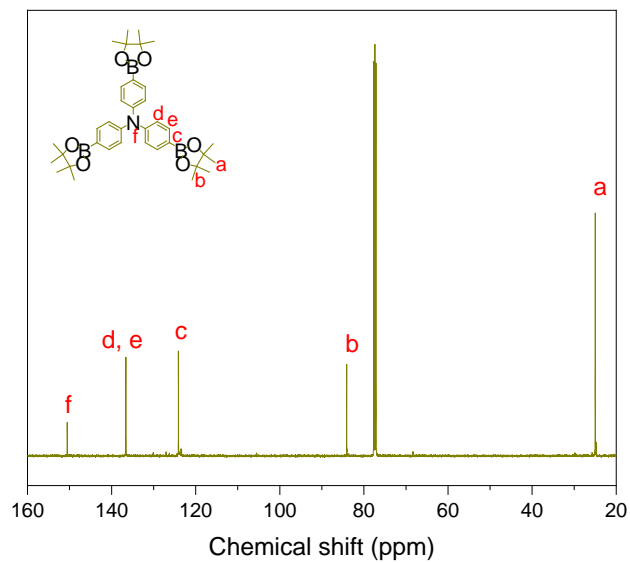

**Fig. S5**  $^{13}\text{C}$  NMR spectrum of TPA-3Bpin.

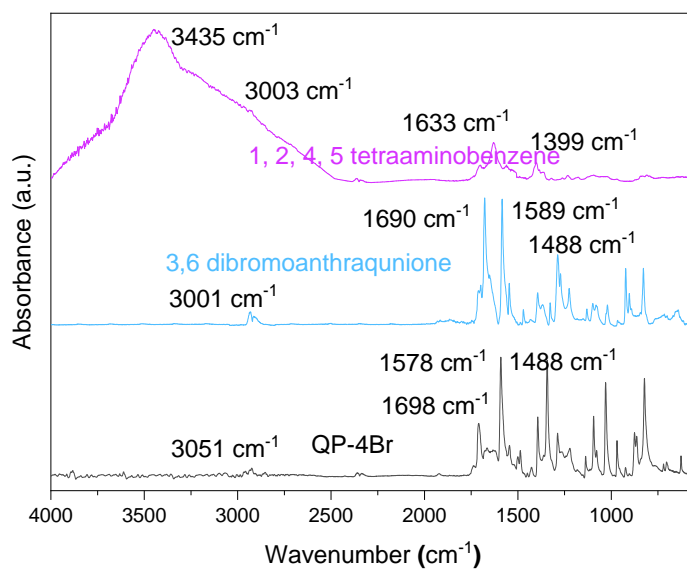

**Fig. S6** FTIR spectrum of 1,2,4,5 tetramino-benzene, 3,6-dibromophenanthrene-9,10-dione, and QP-4Br.

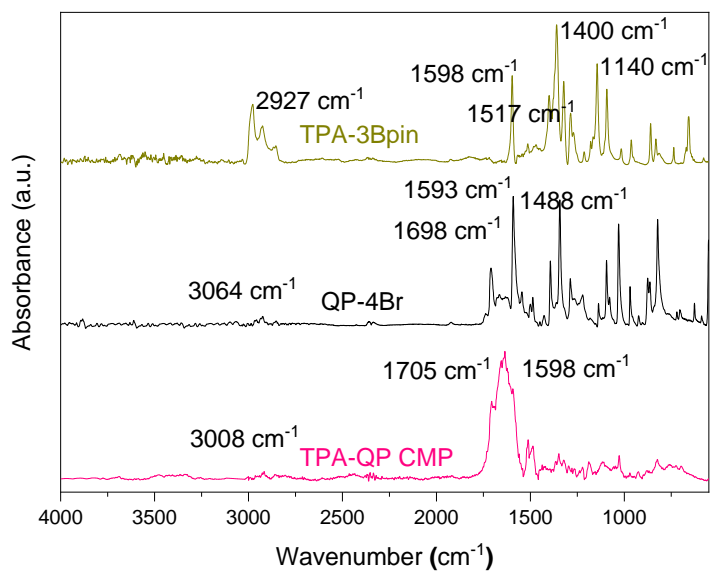

**Fig. S7** FTIR spectrum of TPA-Bpin, QP-4Br, and TPA-QP CMP.

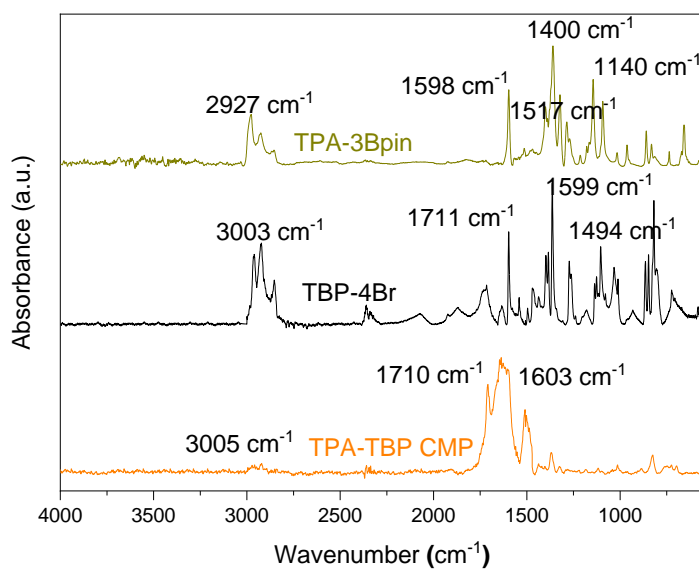

**Fig. S8** FTIR spectrum of TPA-Bpin, TBP-4Br, and TPA-TBP CMP.



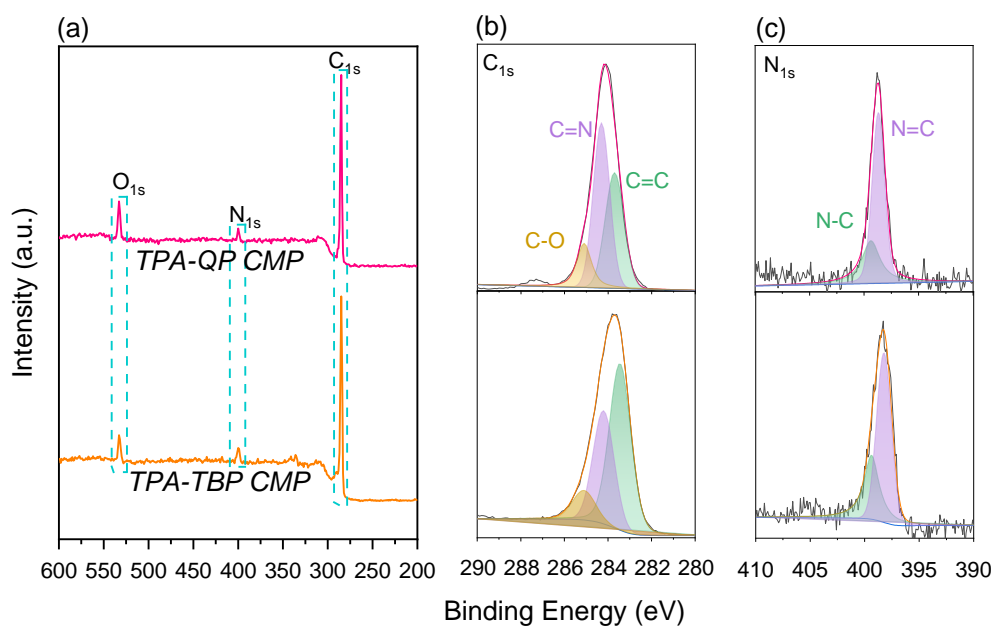

Fig.S9 Wide-scan XPS profiles (a), High-resolution XPS profiles attributed to the C 1s (b), and N 1s (c), of TPA-QP and TPA-TBP CMPs respectively.

Table S1 FWHM and area of various species detected through XPS

| CMP     | C1s            |          |                |          |                |          | N1s             |          |                |          |
|---------|----------------|----------|----------------|----------|----------------|----------|-----------------|----------|----------------|----------|
|         | C=C (283.7 eV) |          | C=N (284.3 eV) |          | C-O (285.1 eV) |          | N-C (399.36 eV) |          | N=C (398.6 eV) |          |
|         | FWHM           | Area     | FWHM           | Area     | FWHM           | Area     | FWHM            | Area     | FWHM           | Area     |
| TPA-QP  | 1.02           | 44427.27 | 0.89           | 5536.183 | 0.8            | 1730.391 | 1.9828          | 330.7931 | 1.37           | 675.8508 |
| TPA-TBP | 1.17           | 7641.939 | 1.15           | 4703.811 | 1.24           | 1374.997 | 1.67            | 466.48   | 1.6            | 802.9703 |

### S.5 Thermal gravimetric analysis

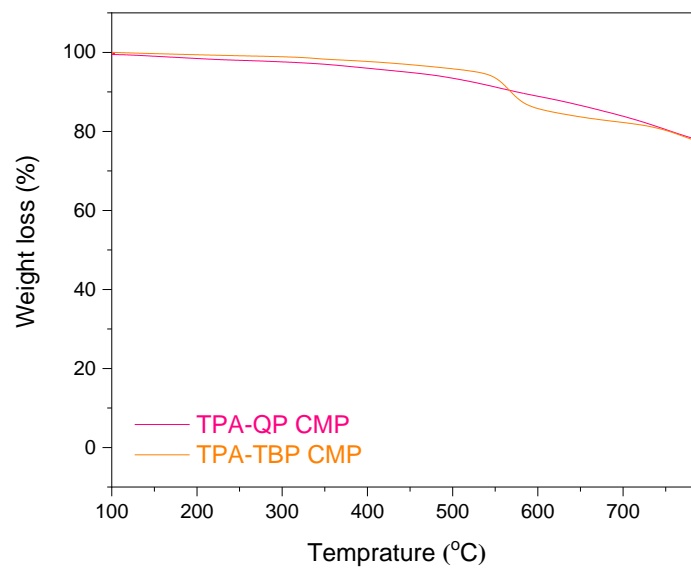

**Fig.S10** TGA analyses of the TPA-QP and TPA-TBP CMPs.

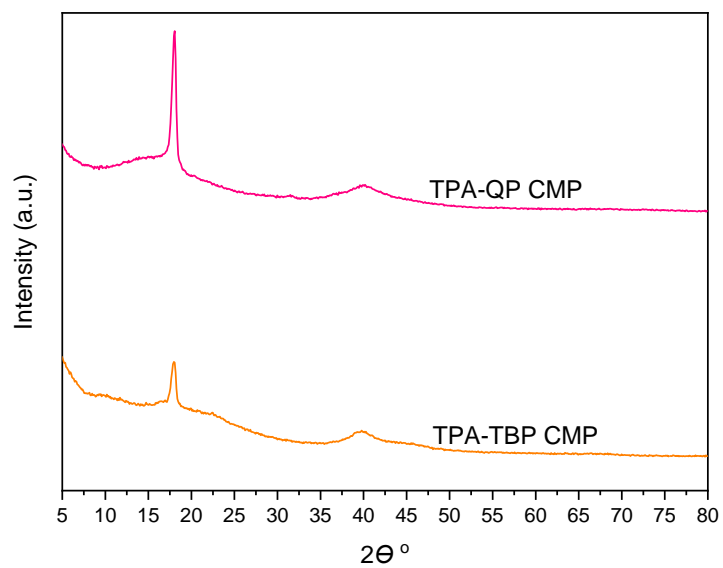

**Fig. S11** XRD of TPA-QP, and TPA-TBP CMPs

## S.6 Electrochemical analysis

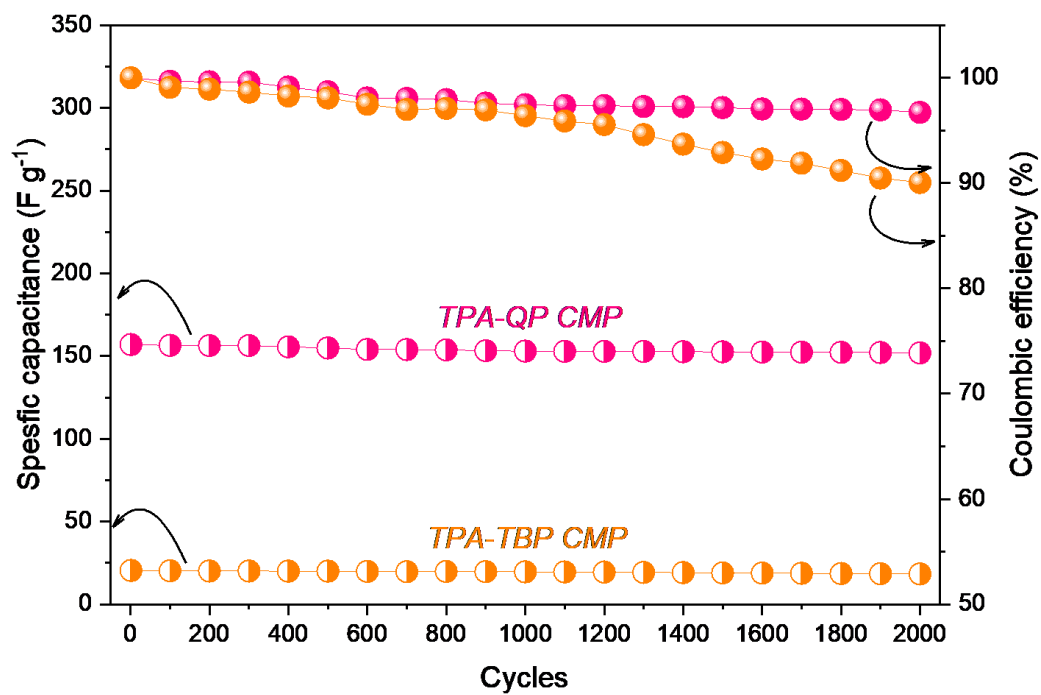

**Fig. S12** Specific capacitance supported by Coulombic efficiency of TPA-QP (pink) and TPA-TBP (orange) CMPs measured at current density 10 A g<sup>-1</sup> within 2000 cycles.

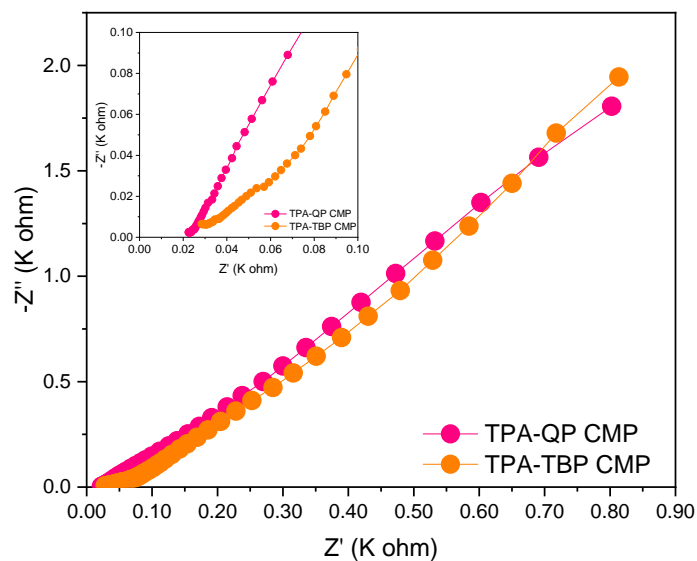

**Fig. S13** EIS spectra of TPA-QP and TPA-TBP CMPs.

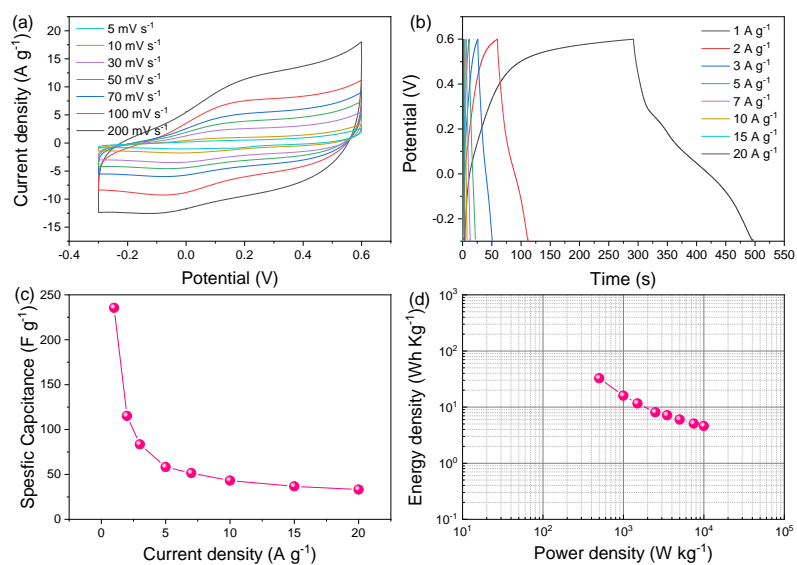

**Fig. S14** CV plateaus (a), GCD curves (b), specific capacitances at various current densities (c), and Ragone plot (d) of SSC coin cells incorporating TPA-QP CMP.

### S.7 Comparison study

**Table S2** Comparison study between energy density alongside power density of QP CMPs with previously reported electrodes

| <i>Polymer</i>          | <i>Energy density<br/>(<math>W\text{ kg}^{-1}</math>)</i> | <i>Power density<br/>(<math>Wh\text{ kg}^{-1}</math>)</i> | <i>Ref.</i> |
|-------------------------|-----------------------------------------------------------|-----------------------------------------------------------|-------------|
| PANI/NCNT               | 11.1                                                      | 980                                                       | 1           |
| MCSF                    | 9.6                                                       | 108.5                                                     | 2           |
| IHPNC- carbon nanotubes | 8.7                                                       | 195                                                       | 3           |
| N-PCNFs/PSN             | 8.5                                                       | 250                                                       | 4           |
| N-CNFs/900              | 7.11                                                      | 125                                                       | 5           |
| FC-CMPs/rGO             | 8                                                         | 124                                                       | 6           |
| TPA-QP CMP              | 50.417                                                    | 500                                                       | This work   |
| TPA-TBP CMP             | 5                                                         | 500                                                       | This work   |

**Table S3** Comparison study between specific surface areas/specific capacitances of TPA-QP and TPA-TBP CMPs with previously reported porous materials employed as supercapacitor electrodes.

| Material                  | Surface area (m <sup>2</sup> g <sup>-1</sup> ) | Capacitance (F g <sup>-1</sup> ) | Current density (A g <sup>-1</sup> ) | Reference  |
|---------------------------|------------------------------------------------|----------------------------------|--------------------------------------|------------|
| N-CMP                     | 267                                            | 71                               | 1                                    | 7          |
| CoPc-CMP                  | N/A                                            | 13.7                             | 1                                    | 8          |
| DAAQ-TFP COF thin film    | N/A                                            | 3                                | 150                                  | 9          |
| N-doped porous nanofibers | 562                                            | 202                              | 1                                    | 5          |
| NWNU- COF-1               | 301                                            | 155.38                           | 0.25                                 | 10         |
| DAB-TFP COF               | 385                                            | 98                               | 0.5                                  | 11         |
| An-CPOP-1                 | 580                                            | 72.75                            | 0.5                                  | 12         |
| An-CPOP-2                 | 1130                                           | 98.4                             | 0.5                                  | 12         |
| PAQBz                     | N/A                                            | 106                              | 0.3                                  | 13         |
| TPA-COF-1                 | 714                                            | 51.3                             | 0.2                                  | 14         |
| TPA-COF-2                 | 478                                            | 14.4                             | 0.2                                  | 14         |
| TPA-COF-3                 | 557                                            | 5.1                              | 0.2                                  | 14         |
| TPT-COF-4                 | 1132                                           | 2.4                              | 0.2                                  | 14         |
| TPT-COF-5                 | 1747                                           | 0.34                             | 0.2                                  | 14         |
| TPT-COF-6                 | 1535                                           | 0.24                             | 0.2                                  | 14         |
| DAAQ-TFP COF              | 1280                                           | 48                               | 0.1                                  | 15         |
| TPA-QP CMP                | 815                                            | 356                              | 1                                    | This study |
| TPA-TBP CMP               | 238                                            | 88                               | 1                                    | This study |

### References and Notes

- 1 R. Malik, L. Zhang, C. Mcconnell, M. Schott, Y.-Y. Hsieh, R. Noga, N. T. Alvarez and V. Shanov, Carbon, 2017, **116**, 579-590.
- 2 Q. Wang, J. Yan, T. Wei, J. Feng, Y. Ren, Z. Fan, M. Zhang and X. Jing, Carbon, 2013, **60**, 481-487.
- 3 S. Zuo, J. Chen, W. Liu, X. Li, Y. Kong, C. Yao and Y. Fu, Carbon, 2018, **129**, 199-206.
- 4 Q. Meng, K. Qin, L. Ma, C. He, E. Liu, F. He, C. Shi, Q. Li, J. Li and N. Zhao, ACS Appl. Mater. Interfaces, 2017, **9**, 30832-30839.
- 5 L.-F. Chen, X.-D. Zhang, H.-W. Liang, M. Kong, Q.-F. Guan, P. Chen, Z.-Y. Wu and S.-H. Yu, ACS nano, 2012, **6**, 7092-7102.
- 6 A. M. Khattak, H. Sin, Z. A. Ghazi, X. He, B. Liang, N. A. Khan, H. R. Alanagh, A. Iqbal, L. Li and Z. Tang, J. Mater. Chem. A, 2018, **6**, 18827-18832.
- 7 S. Y. Park, C. W. Kang, S. M. Lee, H. J. Kim, Y.-J. Ko, J. Choi and S. U. Son, Chem. Eur. J, 2020, **26**, 12343-12348.

- 8 L. Mei, X. Cui, Q. Duan, Y. Li, X. Lv and H.-G. Wang, *Int. J. Hydrog. Energy*, 2020, **45**, 22950-22958.
- 9 C. R. Deblase, K. Hernández-Burgos, K. E. Silberstein, G. G. Rodríguez-Calero, R. P. Bisbey, H. D. Abruña and W. R. Dichtel, *ACS nano*, 2015, **9**, 3178-3183.
- 10 R. Xue, H. Guo, L. Yue, T. Wang, M. Wang, Q. Li, H. Liu and W. Yang, *New J. Chem.*, 2018, **42**, 13726-13731.
- 11 A. M. Khattak, Z. A. Ghazi, B. Liang, N. A. Khan, A. Iqbal, L. Li and Z. Tang, *J. Mater. Chem. A*, 2016, **4**, 16312-16317.
- 12 M. G. Mohamed, X. Zhang, T. H. Mansoure, A. F. M. El-Mahdy, C.-F. Huang, M. Danko, Z. Xin and S.-W. Kuo, *Polymer*, 2020, **205**, 122857.
- 13 W. Yang, B. Huang, L. Li, K. Zhang, Y. Li, J. Huang, X. Tang, T. Hu, K. Yuan and Y. Chen, *Small Methods*, 2020, **4**, 2000434.
- 14 A. F. M. El-Mahdy, C.-H. Kuo, A. Alshehri, C. Young, Y. Yamauchi, J. Kim and S.-W. Kuo, *J. Mater. Chem. A*, 2018, **6**, 19532-19541.
- 15 C. R. Deblase, K. E. Silberstein, T.-T. Truong, H. D. Abruña and W. R. Dichtel, *J. Am. Chem. Soc.*, 2013, **135**, 16821-16824.
